# Supplementary material for: Genome-Wide Association Study of Dietary Pattern Scores
Source: MDPI journal article supplement (doi:10.3390/nu9070649), 2017-06-23
Supplement: s1 [file s1]

**Table S1.** Associations identified between SNPs and Prudent dietary pattern.

| SNP ID <sup>a</sup> | rs number                | Position <sup>b</sup> | P value                | Localization        | Annotated gene | NearestGene  |
|---------------------|--------------------------|-----------------------|------------------------|---------------------|----------------|--------------|
| kgp1355428          | rs76500500               | chr1:63733119         | 1.55x10 <sup>-07</sup> | Intron              | LINC00466      |              |
| kgp2826446          | rs76838052               | chr10:44797954        | 6.45x10 <sup>-07</sup> | Intergenic          |                | C10orf142    |
| <b>rs691184</b>     | <b>rs691184</b>          | chr7:129197408        | 6.79x10 <sup>-07</sup> | Intergenic          |                | SMKR1        |
| kgp6158523          | rs139690209              | chr3:15362622         | 1.34x10 <sup>-06</sup> | Intron              | SH3BP5         |              |
| <b>rs6499924</b>    | <b>rs6499924</b>         | chr16:57970865        | 1.49x10 <sup>-06</sup> | Intron              | CNGB1          |              |
| <b>rs12733446</b>   | <b>rs12733446</b>        | chr1:63666050         | 1.72x10 <sup>-06</sup> | Intron              | LINC00466      |              |
| kgp1202278          | rs17338417               | chr13:115037377       | 1.73x10 <sup>-06</sup> | Intron              | CDC16          |              |
| kgp4916880          | rs116907056              | chr18:63059975        | 1.73x10 <sup>-06</sup> | Intergenic          |                | CDH7         |
| kgp19320517         | rs115384205              | chr20:29860895        | 1.73x10 <sup>-06</sup> | Intergenic          |                | DEFB115      |
| kgp11433779         | rs386813671; rs115591886 | chr20:29893502        | 1.73x10 <sup>-06</sup> | Intron              | DEFB116        |              |
| kgp10839569         | rs114805574              | chr20:29910596        | 1.73x10 <sup>-06</sup> | Intergenic          |                | DEFB116      |
| kgp4584282          | rs113367131              | chr20:29954283        | 1.73x10 <sup>-06</sup> | Promoter            | DEFB118        |              |
| kgp4315795          | rs17122694               | chr20:29956736        | 1.73x10 <sup>-06</sup> | Intron              | DEFB118        |              |
| kgp9682264          | rs34247288               | chr20:29960787        | 1.73x10 <sup>-06</sup> | Exon                | DEFB118        |              |
| kgp2740564          | rs115145768              | chr20:29962345        | 1.73x10 <sup>-06</sup> | 3' near gene region | DEFB118        |              |
| rs17090740          | rs17090740               | chr20:29995517        | 1.73x10 <sup>-06</sup> | Intron              | DEFB121        |              |
| kgp10218471         | rs114225688              | chr20:30033885        | 1.73x10 <sup>-06</sup> | Intron              | DEFB123        |              |
| kgp8087247          | rs116990630              | chr20:30253092        | 1.73x10 <sup>-06</sup> | Exon                | BCL2L1         |              |
| kgp12006704         | rs116949613              | chr20:30286932        | 1.73x10 <sup>-06</sup> | 3'UTR               | BCL2L1         |              |
| kgp8018949          | rs139737644              | chr20:30336668        | 1.73x10 <sup>-06</sup> | Intron              | TPX2           |              |
| rs6471915           | rs6471915                | chr8:61994781         | 1.93x10 <sup>-06</sup> | Intergenic          |                | LOC100130298 |
| <b>kgp10614850</b>  | <b>rs11552145</b>        | chr20:56138648        | 1.97x10 <sup>-06</sup> | Exon                | PCK1           |              |
| kgp11174359         | rs111297422              | chr18:68974849        | 2.18x10 <sup>-06</sup> | Intergenic          |                | LINC01541    |
| <b>kgp10639373</b>  | <b>rs10924198</b>        | chr1:245600716        | 2.48x10 <sup>-06</sup> | Intron              | KIF26B         |              |
| kgp5504930          | rs13042507               | chr20:56102821        | 2.55x10 <sup>-06</sup> | Intergenic          |                | CTCFL        |
| <b>rs10097298</b>   | <b>rs10097298</b>        | chr8:61992256         | 2.65x10 <sup>-06</sup> | Intergenic          |                | LOC100130298 |
| kgp10023042         | rs113983136              | chr9:18919204         | 2.68x10 <sup>-06</sup> | Intergenic          |                | ADAMTSL      |
| kgp3745359          | rs111663987              | chr9:18923128         | 2.68x10 <sup>-06</sup> | Intergenic          |                | SAXO1        |
| kgp6444538          | rs115510004              | chr2:21762805         | 2.90x10 <sup>-06</sup> | Intergenic          |                | LOC645949    |
| kgp9480999          | rs74842138               | chr10:48499927        | 3.01x10 <sup>-06</sup> | Intergenic          |                | GDF10        |
| rs163269            | rs163269                 | chr16:20677170        | 3.04x10 <sup>-06</sup> | Intron              | ACSM1          |              |
| kgp8761639          | rs117875908              | chr19:37549756        | 3.20x10 <sup>-06</sup> | Intergenic          |                | ZNF420       |

|                    |                    |                 |                        |            |           |              |
|--------------------|--------------------|-----------------|------------------------|------------|-----------|--------------|
| kgp386428          | rs148950464        | chr19:37646755  | 3.20x10 <sup>-06</sup> | Intron     | ZNF585A   |              |
| kgp3321820         | rs117896655        | chr19:37667428  | 3.20x10 <sup>-06</sup> | Intergenic |           | ZNF585A      |
| rs10833529         | rs10833529         | chr11:21439476  | 3.38x10 <sup>-06</sup> | Intron     | NELL1     |              |
| kgp4595579         | rs12759252         | chr1:63739886   | 3.38x10 <sup>-06</sup> | Intron     | LINC00466 |              |
| kgp8452249         | rs62105778         | chr2:2769920    | 3.48x10 <sup>-06</sup> | Intergenic |           | LINC01250    |
| <b>kgp11866549</b> | <b>rs35480289</b>  | chr8:93501729   | 3.54x10 <sup>-06</sup> | Intergenic |           | LOC102724710 |
| kgp9260764         | rs1454469          | chr6:81402538   | 3.56x10 <sup>-06</sup> | Intergenic |           | BCKDHB       |
| <b>rs976145</b>    | <b>rs976145</b>    | chr6:81407258   | 3.56x10 <sup>-06</sup> | Intergenic |           | BCKDHB       |
| rs7593468          | rs7593468          | chr2:36938368   | 4.49x10 <sup>-06</sup> | Intron     | VIT       |              |
| kgp2178065         | rs144452299        | chr2:48641000   | 4.79x10 <sup>-06</sup> | Intergenic |           | PPP1R21      |
| kgp12508031        | rs36148756         | chr8:15315518   | 4.94x10 <sup>-06</sup> | Intergenic |           | TUSC3        |
| kgp19572280        | rs17091770         | chr14:57066930  | 5.32x10 <sup>-06</sup> | Intron     | TMEM260   |              |
| kgp12009830        | rs117527115        | chr18:68803533  | 5.44x10 <sup>-06</sup> | Intergenic |           | LINC01541    |
| rs1327609          | rs1327609          | chr1:81755444   | 5.48x10 <sup>-06</sup> | Intergenic |           | LPHN2        |
| kgp15183992        | rs60402019         | chr1:17407958   | 5.68x10 <sup>-06</sup> | Intron     | PADI2     |              |
| rs28386778         | rs28386778         | chr17:61964815  | 6.23x10 <sup>-06</sup> | Intergenic |           | GH2          |
| kgp8157896         | rs150492560        | chr2:138282582  | 6.55x10 <sup>-06</sup> | Intron     | THSD7B    |              |
| kgp6489287         | rs117919802        | chr17:68238883  | 6.57x10 <sup>-06</sup> | Intergenic |           | KCNJ2        |
| kgp9154489         | rs879002           | chr7:129196988  | 6.68x10 <sup>-06</sup> | Intergenic |           | SMKR1        |
| kgp1193130         | rs7821545          | chr8:61994173   | 6.68x10 <sup>-06</sup> | Intergenic |           | LOC100130298 |
| <b>rs7144547</b>   | <b>rs7144547</b>   | chr14:81881735  | 6.71x10 <sup>-06</sup> | Intron     | STON2     |              |
| <b>kgp466155</b>   | <b>rs142426031</b> | chr12:81518237  | 6.74x10 <sup>-06</sup> | Intron     | ACSS3     |              |
| kgp6972810         | rs73180793         | chr20:56133517  | 6.92x10 <sup>-06</sup> | Intergenic |           | PCK1         |
| kgp12008054        | rs6070157          | chr20:56137184  | 6.92x10 <sup>-06</sup> | Exon       | PCK1      |              |
| rs9513868          | rs9513868          | chr13:101869226 | 6.95x10 <sup>-06</sup> | Intron     | NALCN     |              |
| rs574048           | rs574048           | chr8:93493264   | 7.31x10 <sup>-06</sup> | Intergenic |           | LOC102724710 |
| <b>kgp2552679</b>  | <b>rs112374894</b> | chr14:89008546  | 7.42x10 <sup>-06</sup> | Intron     | PTPN21    |              |
| rs10180394         | rs10180394         | chr2:138293641  | 7.52x10 <sup>-06</sup> | Intron     | THSD7B    |              |
| kgp8388119         | rs76587784         | chr2:138306964  | 7.52x10 <sup>-06</sup> | Intron     | THSD7B    |              |
| <b>kgp4289407</b>  | <b>rs114123656</b> | chr2:6747884    | 7.72x10 <sup>-06</sup> | Intergenic |           | LINC01246    |
| kgp1447844         | rs2854206          | chr17:61947203  | 7.75x10 <sup>-06</sup> | Intergenic |           | CSH2         |
| kgp10688171        | rs144869524        | chr2:138175628  | 7.80x10 <sup>-06</sup> | Intron     | THSD7B    |              |
| kgp24036278        | rs150394950        | chr2:138425298  | 7.80x10 <sup>-06</sup> | Intron     | THSD7B    |              |
| <b>rs1560555</b>   | <b>rs1560555</b>   | chr8:62000239   | 8.50x10 <sup>-06</sup> | Intergenic |           | LOC100130298 |

|                  |                        |                 |                        |            |           |              |
|------------------|------------------------|-----------------|------------------------|------------|-----------|--------------|
| kgp26381623      | rs146855431            | chr6:87682167   | 8.53x10 <sup>-06</sup> | Intron     | HTR1E     |              |
| kgp2384392       | rs116278971            | chr2:48678983   | 8.70x10 <sup>-06</sup> | Intron     | PPP1R21   |              |
| kgp7759449       | rs12547205             | chr8:93496111   | 8.72x10 <sup>-06</sup> | Intergenic |           | LOC102724710 |
| kgp7136231       | rs386727780; rs2000884 | chr8:93498680   | 8.72x10 <sup>-06</sup> | Intergenic |           | LOC102724710 |
| rs17622419       | rs17622419             | chr13:101940873 | 8.92x10 <sup>-06</sup> | Intron     | NALCN     |              |
| rs1568555        | rs1568555              | chr3:71193197   | 9.21x10 <sup>-06</sup> | Intron     | FOXP1     |              |
| rs12752453       | rs12752453             | chr1:63738041   | 9.41x10 <sup>-06</sup> | Intron     | LINC00466 |              |
| rs12752487       | rs12752487             | chr1:63738127   | 9.41x10 <sup>-06</sup> | Intron     | LINC00466 |              |
| kgp2972657       | rs62091597             | chr18:53708389  | 9.50x10 <sup>-06</sup> | Intergenic |           | LINC01539    |
| kgp11353664      | rs13297541             | chr9:28087904   | 9.59x10 <sup>-06</sup> | Intron     | LINGO2    |              |
| kgp5148773       | rs77409462             | chr8:68939373   | 9.68x10 <sup>-06</sup> | Intron     | PREX2     |              |
| <b>kgp750736</b> | <b>rs13408523</b>      | chr2:36952284   | 9.75x10 <sup>-06</sup> | Intron     | VIT       |              |

<sup>a</sup> SNP ID according to Illumina® HumanOmni5-Quad BeadChip. <sup>b</sup> Positions according to Illumina® HumanOmni5-Quad BeadChip annotations (genome build 37). Boldface values represent SNPs identified as potential leading SNPs in stepwise regression analysis.

**Table S2.** Associations identified between SNPs and Western dietary pattern.

| SNP ID <sup>a</sup> | rs number                    | Position <sup>b</sup> | P value                | Localization        | Annotated gene | NearestGene  |
|---------------------|------------------------------|-----------------------|------------------------|---------------------|----------------|--------------|
| <b>kgp7827436</b>   | <b>rs13212846</b>            | chr6:50301100         | 4.16x10 <sup>-08</sup> | Intergenic          |                | DEFB112      |
| kgp9374426          | rs116812750                  | chr1:241484705        | 3.40x10 <sup>-07</sup> | Intron              | RGS7           |              |
| <b>kgp9469075</b>   | <b>rs72736220</b>            | chr4:153093814        | 5.35x10 <sup>-07</sup> | Intergenic          |                | LOC100996286 |
| <b>kgp1054774</b>   | <b>rs113152482</b>           | chr10:6278311         | 7.88x10 <sup>-07</sup> | 3' near gene region | PFKFB3         |              |
| kgp26148321         | rs141382233                  | chr6:157538645        | 8.15x10 <sup>-07</sup> | Intergenic          |                | ARID1B       |
| kgp9033598          | rs79041188                   | chr6:152039889        | 2.07x10 <sup>-06</sup> | Intron              | ESR1           |              |
| <b>kgp4441528</b>   | <b>rs2535974</b>             | chr7:152635944        | 2.08x10 <sup>-06</sup> | Intergenic          |                | ACTR3B       |
| kgp9282379          | rs200247                     | chr6:50401480         | 2.54x10 <sup>-06</sup> | Intergenic          |                | TFAP2D       |
| <b>rs727628</b>     | <b>rs727628; rs386791640</b> | chr16:65327828        | 3.68x10 <sup>-06</sup> | Intron              | LINC00922      |              |
| kgp27660318         | rs140957346                  | chr12:93249531        | 4.05x10 <sup>-06</sup> | Intron              | EEA1           |              |
| kgp8552867          | rs13218599                   | chr6:50259937         | 4.14x10 <sup>-06</sup> | Intergenic          |                | DEFB112      |
| rs1348307           | rs1348307                    | chr10:6788713         | 4.23x10 <sup>-06</sup> | Intergenic          |                | LINC00706    |
| rs7911681           | rs7911681                    | chr10:83742695        | 4.36x10 <sup>-06</sup> | Intron              | NRG3           |              |
| <b>kgp3463956</b>   | <b>rs7259811</b>             | chr19:57225019        | 5.23x10 <sup>-06</sup> | Intergenic          |                | ZNF835       |
| <b>kgp17975556</b>  | <b>rs115054628</b>           | chr3:4662824          | 5.37x10 <sup>-06</sup> | Intron              | ITPR1          |              |
| kgp23918889         | rs72822576                   | chr17:14443315        | 5.44x10 <sup>-06</sup> | Intergenic          |                | HS3ST3B1     |
| kgp7404186          | rs1559367                    | chr16:49444459        | 5.47x10 <sup>-06</sup> | Intergenic          |                | C16orf78     |
| kgp7930843          | rs2535954                    | chr7:152631404        | 5.71x10 <sup>-06</sup> | Intergenic          |                | ACTR3B       |
| kgp8978882          | rs112040989                  | chr4:105797467        | 6.83x10 <sup>-06</sup> | Intergenic          |                | LOC101929468 |
| kgp9399667          | rs112764838                  | chr4:105865055        | 6.83x10 <sup>-06</sup> | Intergenic          |                | TET2         |
| kgp6498073          | rs112633616                  | chr12:23238326        | 7.95x10 <sup>-06</sup> | Intergenic          |                | LOC101928441 |
| kgp12198489         | rs148295121                  | chr17:70383353        | 8.26x10 <sup>-06</sup> | Intergenic          |                | LINC00673    |
| kgp29240591         | rs148696004                  | chr4:167164747        | 8.38x10 <sup>-06</sup> | Intergenic          |                | TLL1         |
| <b>rs9446824</b>    | <b>rs9446824</b>             | chr6:73737716         | 8.58x10 <sup>-06</sup> | Intron              | KCNQ5          |              |
| kgp9730403          | rs117158239                  | chr12:23426178        | 8.66x10 <sup>-06</sup> | Intergenic          |                | LOC101928441 |
| <b>kgp25610618</b>  | <b>rs140552175</b>           | chr16:88245733        | 8.71x10 <sup>-06</sup> | Intergenic          |                | LOC101928880 |
| kgp12049353         | rs10413540                   | chr19:57226861        | 9.60x10 <sup>-06</sup> | Intergenic          |                | ZNF835       |

<sup>a</sup> SNP ID according to Illumina® HumanOmni5-Quad BeadChip. <sup>b</sup> Positions according to Illumina® HumanOmni5-Quad BeadChip annotations (genome build 37). Boldface values represent SNPs identified as potential leading SNPs in stepwise regression analysis.

**Table S3.** Description of gene expression cohort.

| Characteristics               | All           | Men           | Women          |
|-------------------------------|---------------|---------------|----------------|
| Number                        | 30            | 13            | 17             |
| Age (years)                   | 34.0 ± 9.0    | 33.5 ± 7.6    | 34.4 ± 10.2    |
| BMI (kg/m <sup>2</sup> )      | 29.2 ± 3.8    | 29.1 ± 4.5    | 29.3 ± 3.3     |
| Waist girth (cm)              | 90.4 ± 10.3   | 95.8 ± 10.5   | 86.2 ± 8.2     |
| <u>Lipid profile</u>          |               |               |                |
| Total-C (mmol/l)              | 5.23 ± 0.92   | 5.36 ± 0.89   | 5.13 ± 0.96    |
| LDL-C (mmol/l)                | 3.14 ± 0.94   | 3.44 ± 0.92   | 2.91 ± 0.91    |
| HDL-C (mmol/l)                | 1.40 ± 0.37   | 1.21 ± 0.37   | 1.55 ± 0.31    |
| TG (mmol/l)                   | 1.49 ± 0.86   | 1.54 ± 0.84   | 1.45 ± 0.90    |
| Total-C / HDL-C               | 4.04 ± 1.39   | 4.83 ± 1.56   | 3.43 ± 0.88    |
| <u>Blood pressure (mm Hg)</u> |               |               |                |
| SBP                           | 107.1 ± 10.1  | 108.1 ± 10.1  | 106.4 ± 10.3   |
| DBP                           | 70.8 ± 7.7    | 72.7 ± 7.6    | 69.3 ± 7.6     |
| Fasting glucose (mmol/l)      | 4.88 ± 0.54   | 4.86 ± 0.60   | 4.90 ± 0.50    |
| Insulin (pmol/l)              | 111.4 ± 156.7 | 115.7 ± 233.5 | 77.6 ± 28.4    |
| CRP (mg/L)                    | 4.49 ± 7.08   | 2.25 ± 1.82   | 6.08 ± 8.88    |
| <u>Diet scores</u>            |               |               |                |
| Prudent                       | 0.050 ± 1.054 | 0.093 ± 1.054 | 0.016 ± 1.086  |
| Western                       | 0.036 ± 0.820 | 0.218 ± 0.892 | -0.103 ± 0.758 |

Values presented (means ± SD) are untransformed and unadjusted. Abbreviations: BMI, body mass index; Total-C, total cholesterol; LDL-C; low-density lipoprotein cholesterol; HDL-C, high-density lipoprotein cholesterol; TG, triglycerides; SBP, systolic blood pressure; DBP, diastolic blood pressure; CRP, C-reactive protein.

**Table S4.** Transcription factors overrepresented in surrounding regions (60 bp) of Prudent dietary pattern-associated SNPs.

| Matrix Name <sup>a</sup> | Matrix ID <sup>a</sup> | FDR-corrected <i>p</i> value |
|--------------------------|------------------------|------------------------------|
| V\$ZNF333_01             | M01230                 | 5.5x10 <sup>-26</sup>        |
| V\$TBP_Q6                | M00980                 | 1.2x10 <sup>-14</sup>        |
| V\$FOXM1_01              | M00630                 | 2.3x10 <sup>-09</sup>        |
| V\$IRF8_Q6               | M01665                 | 8.8x10 <sup>-09</sup>        |
| V\$PAX2_02               | M00486                 | 1.2x10 <sup>-08</sup>        |
| V\$OG2_01                | M01162                 | 2.1x10 <sup>-06</sup>        |
| V\$GR_Q6_01              | M00921                 | 1.1x10 <sup>-05</sup>        |
| V\$HOXA13_01             | M01292                 | 7.1x10 <sup>-05</sup>        |
| V\$RUSH1A_02             | M01107                 | 9.4x10 <sup>-05</sup>        |
| V\$NKX62_Q2              | M00489                 | 0.0002                       |
| V\$CEBPB_01              | M00109                 | 0.0002                       |
| V\$TBP_01                | M00471                 | 0.0004                       |
| V\$CEBP_Q2_01            | M00912                 | 0.0004                       |
| V\$STAT5A_03             | M00493                 | 0.0007                       |
| V\$GATA3_01              | M00077                 | 0.0007                       |
| V\$GATA3_03              | M00351                 | 0.001                        |
| V\$CDXA_01               | M00100                 | 0.002                        |
| V\$FOXP1_01              | M00987                 | 0.003                        |
| V\$XFD1_01               | M00267                 | 0.003                        |
| V\$OCT1_03               | M00137                 | 0.003                        |
| V\$CDXA_02               | M00101                 | 0.004                        |
| V\$HOXA13_02             | M01297                 | 0.005                        |
| V\$SRX_01                | M00148                 | 0.005                        |
| V\$EVI1_05               | M00082                 | 0.006                        |
| V\$IRX5_01               | M01472                 | 0.006                        |
| V\$POU1F1_Q6             | M00744                 | 0.006                        |
| V\$XFD2_01               | M00268                 | 0.008                        |
| V\$IRX2_01               | M01405                 | 0.008                        |

|               |        |       |
|---------------|--------|-------|
| V\$GF11_Q6    | M01067 | 0.009 |
| V\$PITX2_Q2   | M00482 | 0.009 |
| V\$IRXB3_01   | M01377 | 0.01  |
| V\$EVI1_06    | M00011 | 0.01  |
| V\$XFD3_01    | M00269 | 0.01  |
| V\$IPF1_04    | M01236 | 0.01  |
| V\$FOX_Q2     | M00809 | 0.01  |
| V\$POU6F1_01  | M00465 | 0.01  |
| V\$FOXO1_Q5   | M01216 | 0.01  |
| V\$FOXO3A_Q1  | M01137 | 0.01  |
| V\$RORA2_01   | M00157 | 0.02  |
| V\$TEF_Q6     | M00672 | 0.02  |
| V\$IRX4_01    | M01410 | 0.02  |
| V\$GATA1_02   | M00126 | 0.02  |
| V\$FREAC7_01  | M00293 | 0.02  |
| V\$OCT1_Q5_01 | M00930 | 0.02  |
| V\$NKX32_01   | M01181 | 0.02  |
| V\$IRX3_01    | M01318 | 0.03  |
| V\$EVI1_03    | M00080 | 0.03  |
| V\$OCT_Q6     | M00795 | 0.03  |
| V\$MSX1_01    | M00394 | 0.03  |
| V\$FOXP3_01   | M01599 | 0.03  |
| V\$ATATA_B    | M00311 | 0.03  |
| V\$SATB1_01   | M01232 | 0.03  |
| V\$HMGY_Q3    | M01010 | 0.03  |
| V\$OCT1_04    | M00138 | 0.03  |
| V\$IRX3_02    | M01485 | 0.03  |
| V\$HOXA3_01   | M00395 | 0.03  |
| V\$CDP_02     | M00102 | 0.03  |
| V\$POU3F2_02  | M00464 | 0.03  |
| V\$FOXJ2_02   | M00423 | 0.03  |

|             |        |      |
|-------------|--------|------|
| V\$EN1_01   | M00396 | 0.03 |
| V\$EVI1_04  | M00081 | 0.04 |
| V\$IPF1_Q6  | M01275 | 0.04 |
| V\$EVI1_02  | M00079 | 0.04 |
| V\$APOLYA_B | M00310 | 0.05 |
| V\$STAT6_02 | M00500 | 0.05 |
| V\$HFH4_01  | M00742 | 0.05 |

---

<sup>a</sup> Matrix name and matrix ID according to Transfac database. Overrepresented TF were identified using TRAP multiple sequences.



**Table S5.** Transcription factors overrepresented in surrounding regions (60 bp) of Western dietary pattern-associated SNPs.

| Matrix Name <sup>a</sup> | Matrix ID <sup>a</sup> | FDR-corrected <i>p</i> value |
|--------------------------|------------------------|------------------------------|
| V\$HMGY_Q6               | M00750                 | 1.2x10 <sup>-06</sup>        |
| V\$HMGY_01               | M01653                 | 1.2x10 <sup>-06</sup>        |
| V\$HOXA3_01              | M00395                 | 1.2x10 <sup>-06</sup>        |
| V\$STAT5A_03             | M00493                 | 4.9x10 <sup>-05</sup>        |
| V\$ZNF333_01             | M01230                 | 0.0004                       |
| V\$STAT6_02              | M00500                 | 0.002                        |
| V\$IRF8_Q6               | M01665                 | 0.002                        |
| V\$OG2_01                | M01162                 | 0.003                        |
| V\$IPF1_Q6               | M01275                 | 0.01                         |
| V\$STAT1_03              | M00496                 | 0.02                         |
| V\$HMGY_Q3               | M01010                 | 0.02                         |
| V\$NKX62_Q2              | M00489                 | 0.02                         |
| V\$TBX15_02              | M01264                 | 0.02                         |
| V\$NFAT1_Q6              | M01281                 | 0.04                         |

<sup>a</sup> Matrix name and matrix ID according to Transfac database. Overrepresented TF were identified using TRAP multiple sequences.
